# Supplementary material for: Liposomes Loaded with Everolimus and Coated with Hyaluronic Acid: A Promising Approach for Lung Fibrosis
Source: MDPI journal article supplement (doi:10.3390/ijms22147743), 2021-07-20
Supplement: s1 [file s1]

## Supplementary information

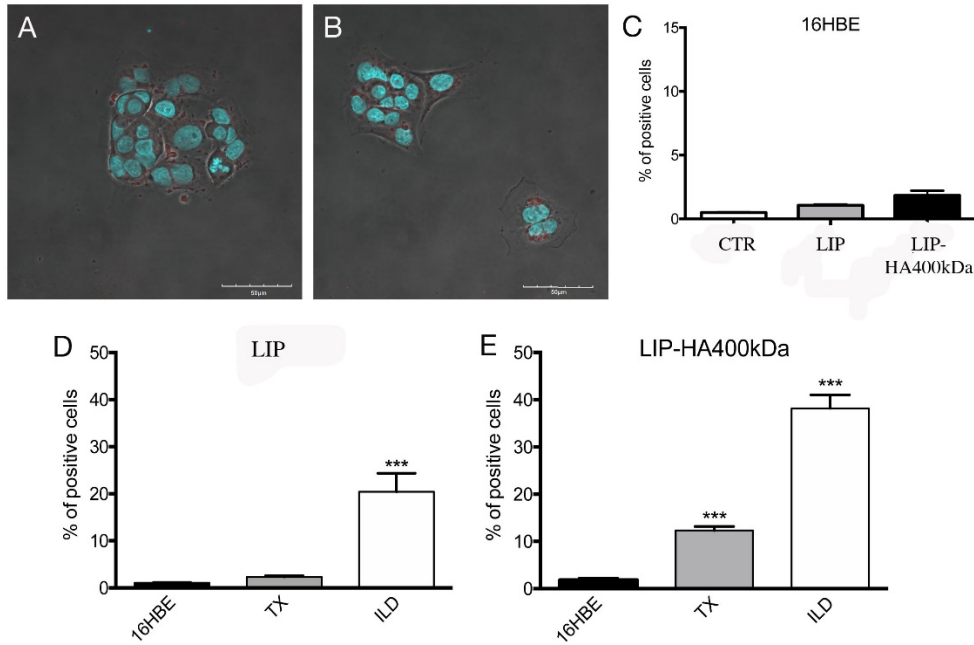

**Figure S1.** Internalization analysis and quantification of LIP and LIP-HA400kDa in CD44-negative cells (16HBE). (A and B) Confocal images of 16HBE treated with (A) LIP and (B) LIP-HA400kDa after 4 h. Nuclei = DAPI; liposomes = red. (C) Flow cytometry analysis of 16HBE incubated with LIP and LIP-HA400kDa. Data are represented as mean of percentage of positive cells  $\pm$  SD. (D and E) Comparison of flow cytometry quantification of (D) LIP and (E) LIP-HA400kDa internalized by 16HBE, TX and CTD-ILD. Data are represented as mean of percentage of positive cells  $\pm$  SD. \*\*\*,  $p < 0.01$  vs. CTR.

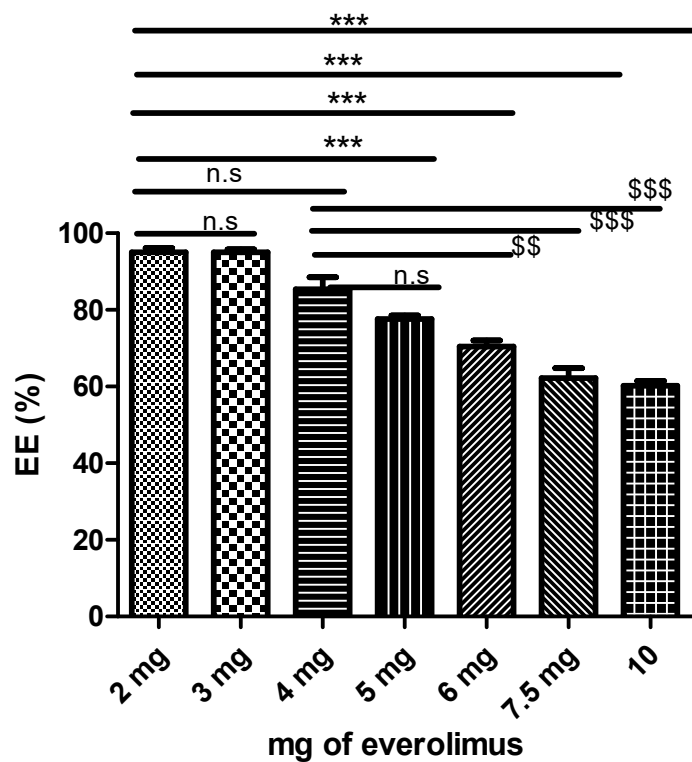

**Figure S2.** EE of liposomes as a function of mg of everolimus added in the PEGylated liposome formulation. \*\*\*,  $p < 0.001$  vs. 2 mg, \$\$,  $p < 0.01$  vs. 4 mg, \$\$\$,  $p < 0.001$  vs. 4 mg. (One-way ANOVA followed by Tukey post-hoc).

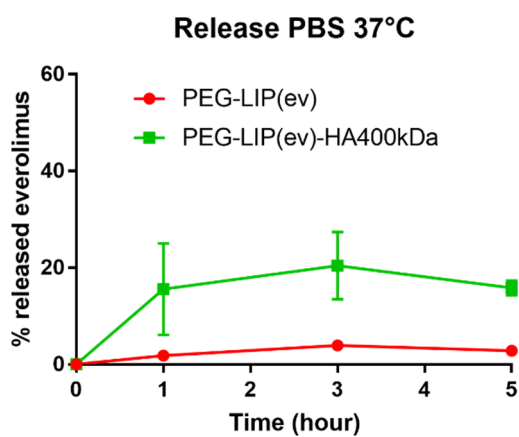

**Figure S3.** Everolimus release profile assessed at 37 °C in PBS at time points of 0, 1, 3 and 5 h.
